# Supplementary material
Source: HighWire-hosted journal article supplement (https://erj.ersjournals.com/content/56/6/2000556)
Supplement: inline-supplementary-material-1 [file inline-supplementary-material-1.pdf]

## ONLINE SUPPLEMENT

### Section 1

Table S1 (legend): Inclusion and Exclusion criteria.

| Inclusion Criteria                                                                                                                                                                                                                                                                                                                                                                                                                                                                                                                                                                                                                                                                                                                                                                                                                                                                                                                                                                                                                                                                                                                                                                                                                                                                                                                                                                                                                                                                                                                                                                                                                                                                                                                                                                                                                                                                                                                                                                                                                                                                                                                                                                                                                                                                                                                                                                                                                                                                                                                                                                                                                                                                                                                                                                                                                                                                                                                                                                                                                                                                                                                                                                                                                               |
|--------------------------------------------------------------------------------------------------------------------------------------------------------------------------------------------------------------------------------------------------------------------------------------------------------------------------------------------------------------------------------------------------------------------------------------------------------------------------------------------------------------------------------------------------------------------------------------------------------------------------------------------------------------------------------------------------------------------------------------------------------------------------------------------------------------------------------------------------------------------------------------------------------------------------------------------------------------------------------------------------------------------------------------------------------------------------------------------------------------------------------------------------------------------------------------------------------------------------------------------------------------------------------------------------------------------------------------------------------------------------------------------------------------------------------------------------------------------------------------------------------------------------------------------------------------------------------------------------------------------------------------------------------------------------------------------------------------------------------------------------------------------------------------------------------------------------------------------------------------------------------------------------------------------------------------------------------------------------------------------------------------------------------------------------------------------------------------------------------------------------------------------------------------------------------------------------------------------------------------------------------------------------------------------------------------------------------------------------------------------------------------------------------------------------------------------------------------------------------------------------------------------------------------------------------------------------------------------------------------------------------------------------------------------------------------------------------------------------------------------------------------------------------------------------------------------------------------------------------------------------------------------------------------------------------------------------------------------------------------------------------------------------------------------------------------------------------------------------------------------------------------------------------------------------------------------------------------------------------------------------|
| <ul style="list-style-type: none"><li>- Males and females <math>\geq 40</math> to <math>\leq 75</math> years of age.</li><li>- Subject is able to read, understand, and sign a written Informed Consent in order to participate in the Study.</li><li>- Subject has been optimally treated according to Gold treatment guidelines without successful resolution of chronic bronchitis and agrees to continue maintenance pulmonary/COPD medications for the duration of the study.</li><li>- Diagnosis of chronic bronchitis (CB) and chronic obstructive pulmonary disease (COPD) for a minimum of two years. (Chronic Bronchitis is defined clinically as chronic productive cough for 3 months in each of 2 successive years in a patient in whom other causes of productive cough have been excluded.)</li><li>- Pre-procedure post bronchodilator FEV1 of greater than or equal to 30% and less than or equal to 80% of predicted within 3 months of enrolment.</li><li>- Smoking history of at least 10 pack years.</li><li>- Non-smoking for a minimum of 2 months prior to consent and agrees to continue not smoking for the duration of the study.</li><li>- Subject is able to adhere to and undergo 3 (4 if in Phase A) bronchoscope procedures that includes lung biopsies and multiple MCS treatments in the opinion of the investigator or per hospital guidelines. (Only Phase A subjects receive biopsies).</li></ul>                                                                                                                                                                                                                                                                                                                                                                                                                                                                                                                                                                                                                                                                                                                                                                                                                                                                                                                                                                                                                                                                                                                                                                                                                                                                                                                                                                                                                                                                                                                                                                                                                                                                                                                                                                                                           |
| Exclusion Criteria                                                                                                                                                                                                                                                                                                                                                                                                                                                                                                                                                                                                                                                                                                                                                                                                                                                                                                                                                                                                                                                                                                                                                                                                                                                                                                                                                                                                                                                                                                                                                                                                                                                                                                                                                                                                                                                                                                                                                                                                                                                                                                                                                                                                                                                                                                                                                                                                                                                                                                                                                                                                                                                                                                                                                                                                                                                                                                                                                                                                                                                                                                                                                                                                                               |
| <ul style="list-style-type: none"><li>- Subject has had an acute pulmonary infection or pneumonia within prior 6 weeks of study bronchoscopy.</li><li>- Subject has had a CB and/or COPD exacerbation (requiring steroids and/or antibiotics) within 6 weeks prior to study bronchoscopy, as defined by their treating physician.</li><li>- Subject has clinically significant bronchiectasis or other respiratory disease other than chronic bronchitis and COPD; subject with chronic cough of other pathogenesis, in particular cardiac cause. Subject with the following conditions should not undergo bronchoscopy: untreatable or life-threatening arrhythmias, inability to adequately oxygenate the patient during the procedure, or subject has acute respiratory failure with hypercapnia (unless intubated and ventilated) or has high grade tracheal stenosis.</li><li>- Diagnosis of asthma with an onset before 30 years of age.</li><li>- Subject has bullous emphysema characterized as large bullae <math>&gt;30</math> millimetres on CT; or subject has stenosis in the tracheobronchial system, tracheobronchomegaly, trachea-bronchomalacia, amyloidosis or cystic fibrosis. If a CT is not available in the past 12 months, the Principle Investigator may use the baseline HRCT in lieu of the CT.</li><li>- Subject has had a transplant.</li><li>- Subject has the inability to walk <math>&gt;140</math> meters.</li><li>- Subject has PaCO<sub>2</sub> <math>&gt;8</math>kPa, or a PaO<sub>2</sub> <math>&lt;7</math>kPa at room air.</li><li>- Subject has a RVSP <math>&gt;45</math>mmHg or a LVEF <math>&lt;45\%</math> on 2D-cardiac echo.</li><li>- Subject has a known mucosal tear, requires treatment to the Right Middle Lobe or has undergone lung surgery: pneumonectomy, lobectomy, bullectomy, lung volume reduction surgery.</li><li>- Subject has had a prior lung device procedure, including emphysema stent(s) implanted, lung coils, valves, lung denervation or other devices for emphysema.</li><li>- Subject is unable to temporarily discontinue use of anticoagulant therapy: warfarin, Coumadin, LMWH, heparin, clopidrogel (or equal).</li><li>- Subject is on <math>&gt;10</math> mg of prednisolone/day.</li><li>- Subject has a serious medical condition, such as: uncontrolled coagulopathy or bleeding disorder, congestive heart failure, uncontrolled angina, myocardial infarction in the past year, renal failure, liver disease, cerebrovascular accident within the past 6 months, uncontrolled diabetes uncontrolled hypertension, autoimmune disease or uncontrolled gastric reflux.</li><li>- Subject is pregnant, nursing, or planning to get pregnant during study duration.</li><li>- Subject has or is receiving chemotherapy or active radiation therapy within the past 6 months or is expected to receive chemotherapy during participation in this study. Subject life expectancy is less than one year.</li><li>- Subject is or has been in another clinical investigational study within 6 weeks of baseline.</li><li>- Subject has known sensitivity to medication required to perform bronchoscopy (such as lidocaine, atropine, and benzodiazepines).</li></ul> |
| CB, Chronic Bronchitis; COPD, Chronic Obstructive Pulmonary Disease; CT, Computed Tomography; FEV1, Forced Expiratory Volume in 1 second; kPA, kilopascal; LVEF, Left Ventricular Ejection Fraction; LMWH, Low Molecular Weight Heparin; MCS, Metered CryoSpray; mg, milligram; mm Hg, millilitre of mercury; PaCO <sub>2</sub> , Partial pressure of carbon dioxide; PaO <sub>2</sub> , Partial pressure of oxygen; RVSP, Right Ventricular Systolic Pressure; 2D, 2-Dimensional.                                                                                                                                                                                                                                                                                                                                                                                                                                                                                                                                                                                                                                                                                                                                                                                                                                                                                                                                                                                                                                                                                                                                                                                                                                                                                                                                                                                                                                                                                                                                                                                                                                                                                                                                                                                                                                                                                                                                                                                                                                                                                                                                                                                                                                                                                                                                                                                                                                                                                                                                                                                                                                                                                                                                                               |

Table S2 (legend): Procedural details.

|                                         | Treatment 1 | Treatment 2 | Treatment 3 | Mean of Treatments |
|-----------------------------------------|-------------|-------------|-------------|--------------------|
| Mean treatment duration (minutes)       | 33.3 ± 11.8 | 31.4 ± 11.5 | 38.3 ± 12.3 | 34.3 ± 12.1        |
| Mean number of metered cryosprays (MCS) | 17.3 ± 4.6  | 17.6 ± 2.1  | 26.2 ± 5.8  | 20.3 ± 6.0         |
| Mean number of Full Doses (sprays)      | 15.2 ± 4.5  | 14.9 ± 2.5  | 21.8 ± 5.4  | 17.3 ± 5.3         |
| Mean number of Partial Doses (sprays)   | 2.2 ± 2.5   | 2.6 ± 2.4   | 4.4 ± 4.2   | 3.1 ± 3.3          |
| Mean percentage of Full Doses (%)       | 87.7        | 85.3        | 84.3        | 85.8               |
| Mean percentage of Partial Doses (%)    | 12.3        | 14.7        | 15.7        | 14.2               |

Table S3 (legend): Subject overview of adverse events over 12-months.

| Adverse Event (AE) categorisation                         | N  | %    |
|-----------------------------------------------------------|----|------|
| Subjects experiencing any AE                              | 35 | 100  |
| Subjects experiencing a Serious AE                        | 11 | 31.4 |
| Subjects experiencing a Device-related AE*                | 4  | 11.4 |
| Subjects experiencing a Serious Device Related AE*        | 0  | 0    |
| Subjects experiencing a Procedure Related AE*             | 21 | 60.0 |
| Subjects experiencing a Serious Procedure Related AE*     | 0  | 0    |
| Subjects experiencing a Severe AE**                       | 6  | 17.1 |
| Subjects experiencing an AE leading to discontinuation*** | 1  | 2.9  |

\* = AE is related if: relation to device / procedure is reported 'Possibly', 'Probably' or 'Causal Relationship'.

\*\* = AE is severe if: severity is reported 'Severe'.

\*\*\* = AE led to discontinuation if: reason for early withdrawal at End of Study is 'Adverse Event' or 'Death'.

Table S4 (legend): Categorization of adverse events over 12-months.

| Adverse Event (AE) categorisation |                                           | N   | %    |
|-----------------------------------|-------------------------------------------|-----|------|
| Serious                           | <i>No</i>                                 | 237 | 94.4 |
|                                   | <i>Yes</i>                                | 14  | 5.6  |
| Causality                         | <i>Concomitant or previous medication</i> | 8   | 3.2  |
|                                   | <i>Disease under study</i>                | 123 | 49.0 |
|                                   | <i>Medical history</i>                    | 37  | 14.7 |
|                                   | <i>Other</i>                              | 83  | 33.1 |
| Relationship to device*           | <i>Not related</i>                        | 245 | 97.6 |
|                                   | <i>Possibly</i>                           | 5   | 2.0  |
|                                   | <i>Probably</i>                           | 1   | 0.4  |
| Relationship to study procedure*  | <i>Not related</i>                        | 205 | 81.7 |
|                                   | <i>Unlikely</i>                           | 6   | 2.4  |
|                                   | <i>Possibly</i>                           | 30  | 12.0 |
|                                   | <i>Probably</i>                           | 10  | 4.0  |
| Severity**                        | <i>Mild</i>                               | 114 | 45.4 |
|                                   | <i>Moderate</i>                           | 129 | 51.4 |
|                                   | <i>Severe</i>                             | 8   | 3.2  |
| Outcome                           | <i>Death</i>                              | 1   | 0.4  |
|                                   | <i>Ongoing</i>                            | 21  | 8.4  |
|                                   | <i>Resolved with sequelae</i>             | 15  | 6.0  |
|                                   | <i>Resolved without sequelae</i>          | 214 | 85.3 |

\* = AE is related if: relation to device or procedure is reported 'Possibly', 'Probably' or 'Causal Relationship'.

\*\* = AE is severe if: severity is reported 'Severe'

Table S5 (legend): Individual classification of adverse events (AEs) over 12-months.

| Adverse Event (AE) - System Organ Classification<br>(listed alphabetically) | Total AEs |     | Total Subjects |      |
|-----------------------------------------------------------------------------|-----------|-----|----------------|------|
|                                                                             | N         | %   | N              | %    |
| <b>Ear and labyrinth disorders</b>                                          | 1         | 0.4 | 1              | 2.9  |
| Hypoacusis                                                                  | 1         | 0.4 | 1              | 2.9  |
| Vertigo                                                                     |           |     |                |      |
| <b>Gastrointestinal disorders</b>                                           |           |     |                |      |
| Abdominal pain upper                                                        | 1         | 0.4 | 1              | 2.9  |
| Diarrhoea                                                                   | 2         | 0.8 | 2              | 5.7  |
| Gastrointestinal disorder                                                   | 1         | 0.4 | 1              | 2.9  |
| Glossodynia                                                                 | 1         | 0.4 | 1              | 2.9  |
| Nausea                                                                      | 4         | 1.6 | 4              | 11.4 |
| Peptic ulcer                                                                | 1         | 0.4 | 1              | 2.9  |
| Rectal haemorrhage                                                          | 1         | 0.4 | 1              | 2.9  |
| Rectal ulcer                                                                | 1         | 0.4 | 1              | 2.9  |
| Toothache                                                                   | 1         | 0.4 | 1              | 2.9  |
| <b>General disorders</b>                                                    |           |     |                |      |
| Chest discomfort                                                            | 3         | 1.2 | 2              | 5.7  |
| Chest pain                                                                  | 4         | 1.6 | 4              | 11   |
| Fatigue                                                                     | 4         | 1.6 | 4              | 11   |
| Pain                                                                        | 1         | 0.4 | 1              | 2.9  |
| Peripheral swelling                                                         | 1         | 0.4 | 1              | 2.9  |
| <b>Hepatobiliary disorders</b>                                              |           |     |                |      |
| Bile duct obstruction                                                       | 1         | 0.4 | 1              | 2.9  |
| <b>Infections and infestations</b>                                          |           |     |                |      |
| Bacterial infection                                                         | 1         | 0.4 | 1              | 2.9  |
| Cellulitis                                                                  | 2         | 0.8 | 2              | 5.7  |
| Cystitis                                                                    | 2         | 0.8 | 2              | 5.7  |
| Haemophilus infection                                                       | 1         | 0.4 | 1              | 2.9  |
| Influenza                                                                   | 3         | 1.2 | 3              | 8.6  |
| Nasopharyngitis                                                             | 5         | 2.0 | 3              | 8.6  |
| Pneumonia                                                                   | 6         | 2.4 | 6              | 17   |
| Pseudomonas infection                                                       | 1         | 0.4 | 1              | 2.9  |
| Respiratory tract infection                                                 | 1         | 0.4 | 1              | 2.9  |
| Rhinitis                                                                    | 1         | 0.4 | 1              | 2.9  |
| Sinusitis                                                                   | 2         | 0.8 | 2              | 5.7  |
| Staphylococcal infection                                                    | 1         | 0.4 | 1              | 2.9  |
| Upper respiratory tract infection                                           | 1         | 0.4 | 1              | 2.9  |
| Urinary tract infection                                                     | 3         | 1.2 | 2              | 5.7  |
| Urosepsis                                                                   | 1         | 0.4 | 1              | 2.9  |
| <b>Injury, poisoning and procedural complications</b>                       |           |     |                |      |
| Fall                                                                        | 1         | 0.4 | 1              | 2.9  |
| Procedural hypotension                                                      | 1         | 0.4 | 1              | 2.9  |
| Rib fracture                                                                | 1         | 0.4 | 1              | 2.9  |
| Skin abrasion                                                               | 1         | 0.4 | 1              | 2.9  |
| Wound complication                                                          | 1         | 0.4 | 1              | 2.9  |
| <b>Investigations</b>                                                       |           |     |                |      |
| Bacterial test positive                                                     | 1         | 0.4 | 1              | 2.9  |
| Blood potassium decreased                                                   | 1         | 0.4 | 1              | 2.9  |
| Blood sodium decreased                                                      | 1         | 0.4 | 1              | 2.9  |
| Moraxella test positive                                                     | 1         | 0.4 | 1              | 2.9  |
| Mycobacterium test positive                                                 | 2         | 0.8 | 2              | 5.7  |

| Adverse Event (AE) - System Organ Classification<br>(listed alphabetically) | Total AEs |      | Total Subjects |      |
|-----------------------------------------------------------------------------|-----------|------|----------------|------|
|                                                                             | N         | %    | N              | %    |
| Pseudomonas test positive                                                   | 1         | 0.4  | 1              | 2.9  |
| Sputum culture positive                                                     | 1         | 0.4  | 1              | 2.9  |
| Streptococcus test positive                                                 | 1         | 0.4  | 1              | 2.9  |
| Vitamin D decreased                                                         | 1         | 0.4  | 1              | 2.9  |
| <b>Metabolism and nutrition disorders</b>                                   |           |      |                |      |
| Hypoglycaemia                                                               | 2         | 0.8  | 1              | 2.9  |
| <b>Musculoskeletal and connective tissue disorders</b>                      |           |      |                |      |
| Arthralgia                                                                  | 2         | 0.8  | 2              | 5.7  |
| Back pain                                                                   | 1         | 0.4  | 1              | 2.9  |
| Bursitis                                                                    | 1         | 0.4  | 1              | 2.9  |
| Dupuytren's contracture                                                     | 1         | 0.4  | 1              | 2.9  |
| Joint swelling                                                              | 2         | 0.8  | 2              | 5.7  |
| Muscle spasms                                                               | 1         | 0.4  | 1              | 2.9  |
| Musculoskeletal discomfort                                                  | 1         | 0.4  | 1              | 2.9  |
| Musculoskeletal pain                                                        | 3         | 1.2  | 3              | 8.6  |
| Neck pain                                                                   | 1         | 0.4  | 1              | 2.9  |
| Pain in extremity                                                           | 1         | 0.4  | 1              | 2.9  |
| Polymyalgia rheumatica                                                      | 1         | 0.4  | 1              | 2.9  |
| <b>Neoplasms benign, malignant</b>                                          |           |      |                |      |
| Malignant melanoma                                                          | 1         | 0.4  | 1              | 2.9  |
| Skin cancer                                                                 | 1         | 0.4  | 1              | 2.9  |
| <b>Nervous system disorders</b>                                             |           |      |                |      |
| Balance disorder                                                            | 1         | 0.4  | 1              | 2.9  |
| Headache                                                                    | 1         | 0.4  | 1              | 2.9  |
| Migraine                                                                    | 1         | 0.4  | 1              | 2.9  |
| Morton's neuralgia                                                          | 1         | 0.4  | 1              | 2.9  |
| Nervous system disorder                                                     | 1         | 0.4  | 1              | 2.9  |
| <b>Psychiatric disorders</b>                                                |           |      |                |      |
| Anxiety                                                                     | 1         | 0.4  | 1              | 2.9  |
| <b>Renal and urinary disorders</b>                                          |           |      |                |      |
| Chronic kidney disease                                                      | 1         | 0.4  | 1              | 2.9  |
| Dysuria                                                                     | 1         | 0.4  | 1              | 2.9  |
| Urinary retention                                                           | 2         | 0.8  | 2              | 5.7  |
| <b>Reproductive system and breast disorders</b>                             |           |      |                |      |
| Breast mass                                                                 | 1         | 0.4  | 1              | 2.9  |
| Pelvis prolapse                                                             | 1         | 0.4  | 1              | 2.9  |
| <b>Respiratory, thoracic and mediastinal disorders</b>                      |           |      |                |      |
| Bronchospasm                                                                | 1         | 0.4  | 1              | 2.9  |
| Chronic obstructive pulmonary disease                                       | 91        | 36.3 | 32             | 91.4 |
| Cough                                                                       | 5         | 2.0  | 4              | 11.4 |
| Dyspnoea                                                                    | 8         | 3.2  | 7              | 20.0 |
| Epistaxis                                                                   | 2         | 0.8  | 2              | 5.7  |
| Hyperventilation                                                            | 1         | 0.4  | 1              | 2.9  |
| Increased viscosity of bronchial secretion                                  | 1         | 0.4  | 1              | 2.9  |
| Lung consolidation                                                          | 2         | 0.8  | 2              | 5.7  |
| Oropharyngeal pain                                                          | 1         | 0.4  | 1              | 2.9  |
| Pulmonary embolism                                                          | 1         | 0.4  | 1              | 2.9  |
| Pulmonary mass                                                              | 8         | 3.2  | 8              | 22.9 |
| Rhinorrhoea                                                                 | 4         | 1.6  | 4              | 11.4 |
| Sputum increased                                                            | 3         | 1.2  | 3              | 8.6  |
| Wheezing                                                                    | 4         | 1.6  | 2              | 5.7  |

| Adverse Event (AE) - System Organ Classification<br>(listed alphabetically) | Total AEs  |            | Total Subjects |            |
|-----------------------------------------------------------------------------|------------|------------|----------------|------------|
|                                                                             | N          | %          | N              | %          |
| <b>Skin and subcutaneous tissue disorders</b>                               |            |            |                |            |
| Eczema                                                                      | 1          | 0.4        | 1              | 2.9        |
| Erythema                                                                    | 1          | 0.4        | 1              | 2.9        |
| <b>Surgical and medical procedures</b>                                      |            |            |                |            |
| Cholecystectomy                                                             | 1          | 0.4        | 1              | 2.9        |
| Hip arthroplasty                                                            | 1          | 0.4        | 1              | 2.9        |
| Knee operation                                                              | 1          | 0.4        | 1              | 2.9        |
| Tooth extraction                                                            | 1          | 0.4        | 1              | 2.9        |
| <b>Vascular disorders</b>                                                   |            |            |                |            |
| Aortic aneurysm                                                             | 2          | 0.8        | 2              | 5.7        |
| Hypertension                                                                | 1          | 0.4        | 1              | 2.9        |
| Hypotension                                                                 | 3          | 1.2        | 3              | 8.6        |
| Thrombophlebitis                                                            | 1          | 0.4        | 1              | 2.9        |
| <b>Total</b>                                                                | <b>251</b> | <b>100</b> | <b>35</b>      | <b>100</b> |

Table S6 (legend): Device-related events.

| Subject | Adverse Event        | Severity | Duration (days) | Outcome                   | Device   | Procedure |
|---------|----------------------|----------|-----------------|---------------------------|----------|-----------|
| 47-011  | Exacerbation of COPD | Mild     | 7               | Resolved without sequelae | Possibly | Possibly  |
| 47-011  | Bronchospasm         | Moderate | 0               | Resolved without sequelae | Probable | Probable  |
| 47-012  | Exacerbation of COPD | Moderate | 15              | Resolved without sequelae | Possibly | Possibly  |
| 47-014  | Exacerbation of COPD | Moderate | 37              | Resolved without sequelae | Possibly | Possibly  |
| 47-014  | Exacerbation of COPD | Moderate | 25              | Resolved without sequelae | Possibly | Possibly  |
| 47-034  | Exacerbation of COPD | Mild     | 14              | Resolved without sequelae | Possibly | Possibly  |

Table S7 (legend): Serious adverse events over 12-months.

| <b>Subject ID</b> | <b>Description of SAE</b> | <b>Duration (days)</b> | <b>Outcome</b>            | <b>Severity</b> | <b>Related to device</b> | <b>Related to procedure</b> |
|-------------------|---------------------------|------------------------|---------------------------|-----------------|--------------------------|-----------------------------|
| 46-003            | Cough increased           | 72                     | Resolved without sequelae | Moderate        | Not Related              | Not Related                 |
| 46-004            | COPD exacerbation         | 9                      | Resolved without sequelae | Moderate        | Not Related              | Not Related                 |
| 46-005            | COPD exacerbation         | 6                      | Resolved without sequelae | Moderate        | Not Related              | Not Related                 |
| 46-006            | COPD exacerbation         | 39                     | Resolved without sequelae | Moderate        | Not Related              | Not Related                 |
| 47-002            | Peptic ulcer              | 117                    | Resolved without sequelae | Severe          | Not Related              | Not Related                 |
| 47-008            | Pulmonary embolus         | 4                      | Resolved with sequelae    | Severe          | Not Related              | Not Related                 |
| 47-008            | Chest pain                | 39                     | Death                     | Severe          | Not Related              | Not Related                 |
| 47-008            | Rectal bleeding           | 1                      | Resolved without sequelae | Severe          | Not Related              | Not Related                 |
| 47-014            | COPD exacerbation         | 10                     | Resolved without sequelae | Severe          | Not Related              | Not Related                 |
| 47-017            | Pneumonia                 | 12                     | Resolved without sequelae | Severe          | Not Related              | Not Related                 |
| 47-034            | COPD exacerbation         | 29                     | Resolved without sequelae | Severe          | Not Related              | Not Related                 |
| 51-003            | Pneumonia                 | 170                    | Resolved without sequelae | Severe          | Not Related              | Not Related                 |
| 51-006            | COPD exacerbation         | 4                      | Resolved without sequelae | Moderate        | Not Related              | Not Related                 |
| 51-006            | Urosepsis                 | 19                     | Resolved without sequelae | Moderate        | Not Related              | Not Related                 |

SAE = Serious Adverse Event

Table S8 (legend): Exacerbation rates over 12-months.

| <b>Time period</b>                                                                      | <b>N</b> | <b>Per patient year</b> |
|-----------------------------------------------------------------------------------------|----------|-------------------------|
| <i>Whole cohort</i>                                                                     |          |                         |
| T1 to 3-months                                                                          | 49       | 2.00                    |
| T1 to 6-months                                                                          | 59       | 2.04                    |
| T1 to 9-months                                                                          | 65       | 1.81                    |
| T1 to 12-months                                                                         | 83       | 1.84                    |
| T3 to 3-months                                                                          | 22       | 2.50                    |
| T3 to 6-months                                                                          | 34       | 2.09                    |
| T3 to 9-months                                                                          | 45       | 1.98                    |
| T3 to 12-months                                                                         | 62       | 1.96                    |
| <i>GOLD grade II</i>                                                                    |          |                         |
| T1 to 3-months                                                                          | 17       | 1.89                    |
| T1 to 6-months                                                                          | 18       | 1.72                    |
| T1 to 9-months                                                                          | 19       | 1.46                    |
| T1 to 12-months                                                                         | 21       | 1.29                    |
| T3 to 3-months                                                                          | 7        | 2.32                    |
| T3 to 6-months                                                                          | 9        | 1.50                    |
| T3 to 9-months                                                                          | 12       | 1.43                    |
| T3 to 12-months                                                                         | 14       | 1.19                    |
| <i>GOLD grade III</i>                                                                   |          |                         |
| T1 to 3-months                                                                          | 32       | 2.03                    |
| T1 to 6-months                                                                          | 41       | 2.29                    |
| T1 to 9-months                                                                          | 46       | 2.01                    |
| T1 to 12-months                                                                         | 62       | 2.10                    |
| T3 to 3-months                                                                          | 15       | 2.44                    |
| T3 to 6-months                                                                          | 25       | 2.41                    |
| T3 to 9-months                                                                          | 33       | 2.24                    |
| T3 to 12-months                                                                         | 48       | 2.28                    |
| GOLD, Global initiative for Obstructive Lung Disease; T1, Treatment 1; T3, Treatment 3. |          |                         |



Table S9 (legend): Changes in St George's Respiratory Questionnaire total scores over 12-months stratified according to disease severity thresholds.

|                                  |                    | <u>3-month</u>                         |                 | <u>6-month</u>                          |                 | <u>9-month</u>                         |                 | <u>12-month</u>                        |                 |
|----------------------------------|--------------------|----------------------------------------|-----------------|-----------------------------------------|-----------------|----------------------------------------|-----------------|----------------------------------------|-----------------|
|                                  |                    | value                                  | <i>p-value</i>  | value                                   | <i>p-value</i>  | value                                  | <i>p-value</i>  | value                                  | <i>p-value</i>  |
| <u>Baseline SGRQ-Total Score</u> |                    | n=24                                   |                 | n=20                                    |                 | n=20                                   |                 | n=21                                   |                 |
| <u>&gt; 50 points</u>            |                    |                                        |                 |                                         |                 |                                        |                 |                                        |                 |
| $\Delta$ SGRQ                    | <i>Total score</i> | -9.8 ± 14.4<br>(95% CI -15.9 to -3.8)  | <b>&lt;0.01</b> | -15.4 ± 15.3<br>(95% CI -22.6 to -8.2)  | <b>&lt;0.01</b> | -13.5 ± 15.4<br>(95% CI -20.7 to -6.3) | <b>&lt;0.01</b> | -10.9 ± 12.1<br>(95% CI -16.4 to -5.4) | <b>&lt;0.01</b> |
|                                  | <i>Symptoms</i>    | -13.2 ± 19.0<br>(95% CI -21.2 to -5.2) | <b>&lt;0.01</b> | -17.2 ± 16.7<br>(95% CI -25.0 to -9.4)  | <b>&lt;0.01</b> | -15.6 ± 16.9<br>(95% CI -23.5 to -7.7) | <b>&lt;0.01</b> | -12.8 ± 17.9<br>(95% CI -20.9 to -4.6) | <b>&lt;0.01</b> |
|                                  | <i>Activity</i>    | -3.9 ± 15.0<br>(95% CI -10.2 to 2.4)   | 0.21            | -9.0 ± 17.2<br>(95% CI -17.1 to -1.0)   | <b>0.03</b>     | -7.8 ± 18.3<br>(95% CI -16.4 to 0.7)   | 0.07            | -5.3 ± 16.1<br>(95% CI -12.7 to 2.0)   | 0.15            |
|                                  | <i>Impacts</i>     | -12.5 ± 17.7<br>(95% CI -19.9 to -5.0) | <b>&lt;0.01</b> | -18.9 ± 18.7<br>(95% CI -27.6 to -10.1) | <b>&lt;0.01</b> | -16.4 ± 19.3<br>(95% CI -25.4 to -7.3) | <b>&lt;0.01</b> | -13.8 ± 16.9<br>(95% CI -21.5 to -6.1) | <b>&lt;0.01</b> |
| <u>Baseline SGRQ-Total Score</u> |                    | n=10                                   |                 | n=10                                    |                 | n=10                                   |                 | n=10                                   |                 |
| <u>&lt; 50 points</u>            |                    |                                        |                 |                                         |                 |                                        |                 |                                        |                 |
| $\Delta$ SGRQ                    | <i>Total score</i> | 2.0 ± 10.9                             | 0.58            | 2.3 ± 8.4                               | 0.41            | 6.3 ± 7.2                              | <b>0.02</b>     | 8.6 ± 12.1                             | 0.05            |

|                                                 |                    |                        |             |                        |                 |                        |                 |                       |             |
|-------------------------------------------------|--------------------|------------------------|-------------|------------------------|-----------------|------------------------|-----------------|-----------------------|-------------|
|                                                 |                    | (95% CI -5.8 to 9.8)   |             | (95% CI -3.7 to 8.3)   |                 | (95% CI 1.1 to 11.4)   |                 | (95% CI 0.0 to 17.3)  |             |
|                                                 | <i>Symptoms</i>    | 10.2 ± 20.8            | 0.15        | 8.2 ± 13.3             | 0.09            | 16.6 ± 13.4            | <b>&lt;0.01</b> | 13.4 ± 17.6           | <b>0.04</b> |
|                                                 |                    | (95% CI -4.6 to 25.0)  |             | (95% CI -1.4, 17.7)    |                 | (95% CI 7.0 to 26.2)   |                 | (95% CI 0.8 to 26.0)  |             |
|                                                 | <i>Activity</i>    | 0.9 ± 15.3             | 0.86        | 4.8 ± 14.8             | 0.33            | 7.8 ± 12.1             | 0.07            | 3.5 ± 9.9             | 0.29        |
|                                                 |                    | (95% CI -10.0 to 11.8) |             | (95% CI -5.8 to 15.4)  |                 | (95% CI -0.8 to 16.4)  |                 | (95% CI -3.5 to 10.6) |             |
|                                                 | <i>Impacts</i>     | 0.3 ± 9.9              | 0.92        | -1.0 ± 7.3             | 0.68            | 2.0 ± 7.1              | 0.39            | 10.2 ± 16.3           | 0.08        |
|                                                 |                    | (95% CI -6.8 to 7.4)   |             | (95% CI -6.2 to 4.3)   |                 | (95% CI -3.1 to 7.1)   |                 | (95% CI -1.5 to 21.8) |             |
| <b><u>Baseline CAT Score &gt; 10 points</u></b> |                    | n=31                   |             | n=28                   |                 | n=28                   |                 | n=29                  |             |
| $\Delta$ SGRQ                                   | <i>Total score</i> | -6.2 ± 14.9            | <b>0.03</b> | -10.0 ± 16.2           | <b>&lt;0.01</b> | -7.6 ± 16.5            | <b>0.02</b>     | -5.5 ± 15.1           | 0.06        |
|                                                 |                    | (95% CI -11.7 to -0.7) |             | (95% CI -16.3 to -3.7) |                 | (95% CI -14.0 to -1.3) |                 | (95% CI -11.2 to 0.3) |             |
|                                                 | <i>Symptoms</i>    | -5.7 ± 22.2            | 0.16        | -8.7 ± 20.3            | <b>0.03</b>     | -5.7 ± 22.2            | 0.19            | -5.8 ± 21.3           | 0.16        |
|                                                 |                    | (95% CI -13.8 to 2.4)  |             | (95% CI -16.6 to -0.8) |                 | (95% CI -14.3 to 3.0)  |                 | (95% CI -13.9 to 2.3) |             |
|                                                 | <i>Activity</i>    | -2.4 ± 15.4            | 0.39        | -4.8 ± 18.0            | 0.17            | -3.1 ± 18.4            | 0.39            | -2.0 ± 15.2           | 0.48        |
|                                                 |                    | (95% CI -8.0 to 3.2)   |             | (95% CI -11.7 to 2.2)  |                 | (95% CI -10.2 to 4.1)  |                 | (95% CI -7.8 to 3.8)  |             |
|                                                 | <i>Impacts</i>     | -8.7 ± 17.4            | <b>0.01</b> | -13.6 ± 18.3           | <b>&lt;0.01</b> | -11.0 ± 18.8           | <b>&lt;0.01</b> | -7.4 ± 19.5           | 0.05        |
|                                                 |                    | (95% CI -15.1 to -2.3) |             | (95% CI -20.7 to -     |                 | (95% CI -18.3 to -3.7) |                 | (95% CI -14.9 to      |             |

|                                          |                    |                                         | 6.5)        |                                        |                 | 0.0)                                   |             |                                         |      |
|------------------------------------------|--------------------|-----------------------------------------|-------------|----------------------------------------|-----------------|----------------------------------------|-------------|-----------------------------------------|------|
| <u>Baseline CAT Score &lt; 10 points</u> | n=2                |                                         | n=2         |                                        | n=2             | n=2                                    |             |                                         |      |
| $\Delta$ SGRQ                            | <i>Total score</i> | -4.8 ± 6.9<br>(95% CI -66.8 to 57.1)    | 0.50        | -2.3 ± 3.5<br>(95% CI -33.6 to 29.1)   | 0.53            | 3.0 ± 5.2<br>(95% CI -43.7 to 49.7)    | 0.56        | 7.3 ± 11.4<br>(95% CI -95.1 to 109.7)   | 0.53 |
|                                          | <i>Symptoms</i>    | 0.7 ± 10.3<br>(95% CI -91.5 to 92.9)    | 0.94        | -9.7 ± 5.2<br>(95% CI -56.8 to 37.4)   | 0.23            | 6.2 ± 18.2<br>(95% CI -157.6 to 169.9) | 0.72        | 16.5 ± 13.7<br>(95% CI -107.0 to 140.0) | 0.34 |
|                                          | <i>Activity</i>    | -8.9 ± 12.9<br>(95% CI -125.2 to 107.4) | 0.51        | 0.4 ± 9.1<br>(95% CI -81.6 to 82.4)    | 0.96            | 3.5 ± 4.7<br>(95% CI -38.4 to 45.5)    | 0.48        | -8.7 ± 4.0<br>(95% CI -44.4 to 26.9)    | 0.20 |
|                                          | <i>Impacts</i>     | -3.9 ± 2.5<br>(95% CI -26.0 to 18.1)    | 0.27        | -2.6 ± 0.5<br>(95% CI -7.3 to 2.1)     | 0.09            | 0.3 ± 2.0<br>(95% CI -18.0 to 18.6)    | 0.86        | 13.9 ± 21.2<br>(95% CI -176.2 to 203.9) | 0.52 |
| <u>Baseline GOLD grade of 3</u>          | n=22               |                                         | n=19        |                                        | n=19            | n=20                                   |             |                                         |      |
| $\Delta$ SGRQ                            | <i>Total score</i> | -6.9 ± 14.4<br>(95% CI -13.3 to -0.5)   | <b>0.04</b> | -10.7 ± 15.5<br>(95% CI -18.2 to -3.3) | <b>&lt;0.01</b> | -8.6 ± 16.6<br>(95% CI -16.6 to -0.6)  | <b>0.04</b> | -6.3 ± 13.1<br>(95% CI -12.4 to -0.1)   | 0.05 |
|                                          | <i>Symptoms</i>    | -9.4 ± 23.4<br>(95% CI -19.8 to 0.9)    | 0.07        | -9.2 ± 20.2<br>(95% CI -18.9 to 0.6)   | 0.06            | -7.2 ± 23.0<br>(95% CI -18.3 to 3.9)   | 0.19        | -7.1 ± 20.1<br>(95% CI -16.5 to 2.3)    | 0.13 |

|                                 |                    |                                       |             |                                        |                 |                                        |             |                                       |             |
|---------------------------------|--------------------|---------------------------------------|-------------|----------------------------------------|-----------------|----------------------------------------|-------------|---------------------------------------|-------------|
|                                 | <i>Activity</i>    | -1.5 ± 14.3<br>(95% CI -7.9 to 4.9)   | 0.63        | -4.7 ± 16.2<br>(95% CI -12.5 to 3.1)   | 0.22            | -2.8 ± 16.1<br>(95% CI -10.5 to 5.0)   | 0.46        | -1.0 ± 10.2<br>(95% CI -5.8 to 3.8)   | 0.66        |
|                                 | <i>Impacts</i>     | -9.2 ± 16.2<br>(95% CI -16.4 to -2.1) | <b>0.01</b> | -14.7 ± 17.6<br>(95% CI -23.2 to -6.3) | <b>&lt;0.01</b> | -12.4 ± 20.2<br>(95% CI -22.1 to -2.7) | <b>0.02</b> | -9.0 ± 18.0<br>(95% CI -17.4 to -0.5) | <b>0.04</b> |
| <b>Baseline GOLD grade of 2</b> |                    | n=10                                  |             | n=9                                    |                 | n=9                                    |             | n=9                                   |             |
| $\Delta$ SGRQ                   | <i>Total score</i> | -5.1 ± 16.4<br>(95% CI -16.8 to 6.7)  | 0.35        | -8.0 ± 18.5<br>(95% CI -22.2 to 6.2)   | 0.23            | -5.7 ± 17.0<br>(95% CI -18.7 to 7.4)   | 0.35        | -2.8 ± 19.6<br>(95% CI -17.9 to 12.2) | 0.68        |
|                                 | <i>Symptoms</i>    | 0.42 ± 20.9<br>(95% CI -14.5 to 15.3) | 0.95        | -8.5 ± 21.8<br>(95% CI -25.2 to 8.3)   | 0.28            | -4.1 ± 21.0<br>(95% CI -20.3 to 12.0)  | 0.57        | -2.3 ± 25.0<br>(95% CI -21.5 to 17.0) | 0.79        |
|                                 | <i>Activity</i>    | -3.5 ± 17.7<br>(95% CI -16.2 to 9.1)  | 0.54        | -5.7 ± 22.3<br>(95% CI -22.8 to 11.4)  | 0.46            | -3.8 ± 23.7<br>(95% CI -22.0 to 14.4)  | 0.64        | -4.4 ± 23.6<br>(95% CI -22.5 to 13.8) | 0.59        |
|                                 | <i>Impacts</i>     | -8.0 ± 20.4<br>(95% CI -22.5 to 6.5)  | 0.25        | -9.7 ± 20.6<br>(95% CI -25.5 to 6.1)   | 0.19            | -7.7 ± 16.5<br>(95% CI -20.4 to 5.0)   | 0.20        | -2.6 ± 23.1<br>(95% CI -20.4 to 15.1) | 0.74        |

Numeric data are presented as mean ± SD or median (IQR). Two-tailed t-test or Wilcoxon matched-pairs signed rank test<sup>†</sup> were used, respectively, to calculate statistical significance between groups. <sup>§</sup>Pre-treatment 1 data used. BMI, Body Mass Index; BODE index = Body mass index, airflow Obstruction, Dyspnoea, and Exercise capacity; CAT, COPD Assessment Test; FEV<sub>1</sub>, Forced Expiratory Volume in 1 second; FIV1, Forced Inspiratory Volume in 1 second; FVC, Forced Vital Capacity; GOLD, Global initiative for Obstructive Lung Disease; IC, Inspiratory Capacity; LCQ, Leicester Cough Questionnaire; mMRC, modified Medical Research Council dyspnoea scale; PO<sub>2</sub>, Partial pressure for oxygen; RAW, airways resistance; RV, Residual Volume; SGRQ, St George's Respiratory Questionnaire; TLC, total lung capacity; TL<sub>CO</sub>, transfer factor for carbon monoxide;

VAS, Visual Analogue Score; VC, Vital Capacity; 6MWD, six-minute walk distance.

Figure S5 (legend): Changes in St George's Respiratory Questionnaire total scores over 12-months stratified according to disease severity thresholds: A) SGRQ-Total Score > 50; B) SGRQ-Total Score < 50; C) CAT score > 10; D) CAT score < 10; E) Baseline GOLD grade 3; F) Baseline GOLD grade 2.

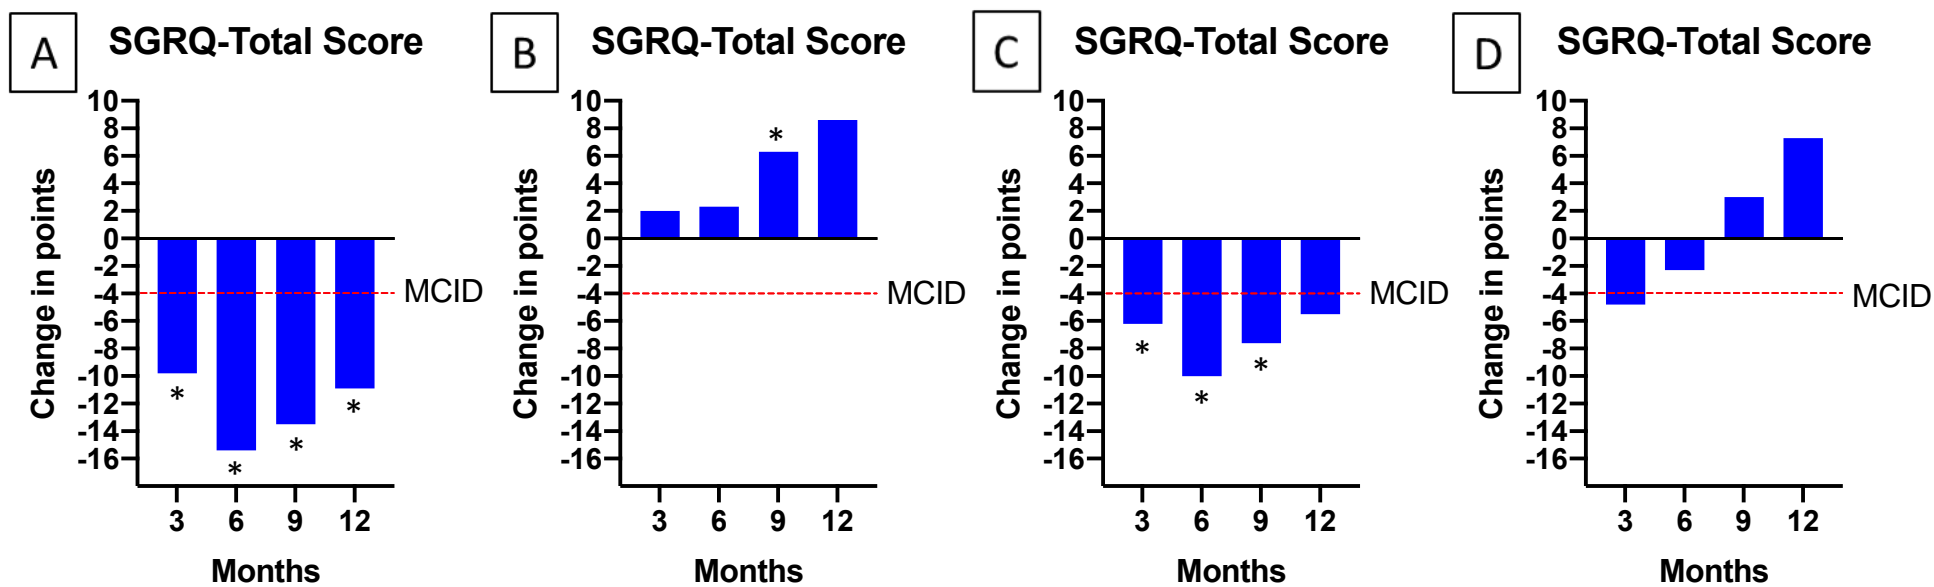

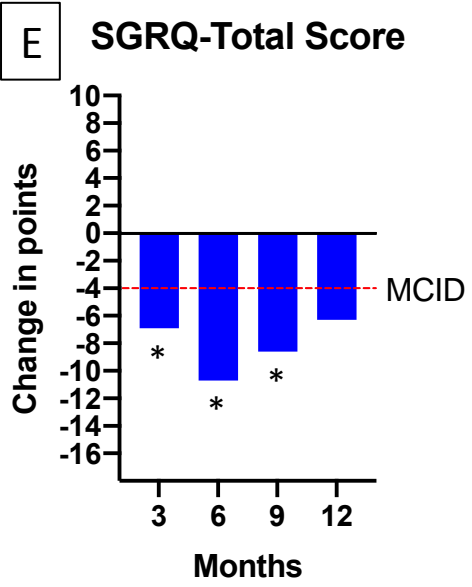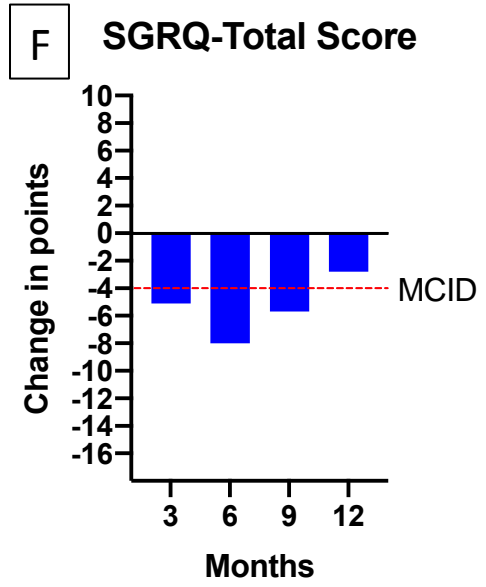

Table S10 (legend): Changes in Patient-Reported Outcomes over 12-months in those individuals with a baseline SGRQ total score > 50 points.

| <u>Baseline SGRQ-Total Score &gt; 50 points</u> | <u>3-month</u>                                |                 | <u>6-month</u>                               |                 | <u>9-month</u>                                |                 | <u>12-month</u>                              |                 |
|-------------------------------------------------|-----------------------------------------------|-----------------|----------------------------------------------|-----------------|-----------------------------------------------|-----------------|----------------------------------------------|-----------------|
|                                                 | value                                         | <i>p-value</i>  | value                                        | <i>p-value</i>  | value                                         | <i>p-value</i>  | value                                        | <i>p-value</i>  |
| $\Delta$ CAT <sup>s</sup>                       | n=23<br>-5.2 ± 7.3<br>(95% CI -8.4 to -2.1)   | <b>&lt;0.01</b> | n=20<br>-5.4 ± 6.8<br>(95% CI -8.6 to -2.3)  | <b>&lt;0.01</b> | n=20<br>-2.2 ± 8.6<br>(95% CI -6.2 to 1.8)    | 0.27            | n=21<br>-4.0 ± 7.0<br>(95% CI -7.2 to -0.8)  | <b>0.02</b>     |
| $\Delta$ LCQ                                    | n=14<br>36.3 ± 28.1<br>(95% CI 20.1 to 52.5)  | <b>&lt;0.01</b> | n=13<br>35.0 ± 29.1<br>(95% CI 17.4 to 52.6) | <b>&lt;0.01</b> | n=12<br>26.2 ± 21.1<br>(95% CI 12.7 to 39.6)  | <b>&lt;0.01</b> | n=13<br>23.5 ± 22.1<br>(95% CI 10.2 to 36.9) | <b>&lt;0.01</b> |
| $\Delta$ mMRC                                   | n=24<br>0 (-1, 0)<br>(95.7% CI 0 to 0)        | 0.24            | n=20<br>0 (-1, 0)<br>(95.9% CI -1 to 0)      | <b>0.04</b>     | n=20<br>0 (-1, 0)<br>(95.9% CI -1 to 0)       | 0.13            | n=21<br>0 (-1, 0)<br>(97.3% CI -1 to 0)      | 0.49            |
| $\Delta$ VAS - Rest <sup>s</sup>                | n=23<br>-10.0 ± 33.5<br>(95% CI -24.4 to 4.5) | 0.17            | n=20<br>-7.4 ± 29.9<br>(95% CI -21.4 to 6.6) | 0.28            | n=20<br>-4.2 ± 36.2<br>(95% CI -21.1 to 12.8) | 0.61            | n=21<br>-5.8 ± 28.3<br>(95% CI -18.6 to 7.1) | 0.36            |
|                                                 | n=23                                          |                 | n=20                                         |                 | n=20                                          |                 | n=21                                         |                 |

|                                      |                                       |      |                                        |             |                                       |      |                                       |      |
|--------------------------------------|---------------------------------------|------|----------------------------------------|-------------|---------------------------------------|------|---------------------------------------|------|
| $\Delta$ VAS - Activity <sup>§</sup> | -10.6 ± 25.1<br>(95% CI -21.4 to 0.3) | 0.06 | -15.8 ± 25.0<br>(95% CI -27.6 to -4.1) | <b>0.01</b> | -11.9 ± 29.1<br>(95% CI -25.5 to 1.7) | 0.08 | -10.9 ± 24.3<br>(95% CI -22.0 to 0.2) | 0.05 |
|--------------------------------------|---------------------------------------|------|----------------------------------------|-------------|---------------------------------------|------|---------------------------------------|------|

Numeric data are presented as mean ± SD or median (IQR). Two-tailed t-test or Wilcoxon matched-pairs signed rank test<sup>†</sup> were used, respectively, to calculate statistical significance between groups. <sup>§</sup>Pre-treatment 1 data used. CAT, COPD Assessment Test; LCQ, Leicester Cough Questionnaire; mMRC, modified Medical Research Council dyspnoea scale; VAS, Visual Analogue Score.



## Section 2

### 2.1. Methodology - Phases of Study

#### *Phase A*

Between 8<sup>th</sup> March 2016 and the 30<sup>th</sup> August 2016, eleven subjects were allocated to receive a single treatment to the right lower lobe and main stem bronchus. Six endobronchial biopsies were collected from the first segmental and lobular bronchi immediately prior to MCS delivery. Bronchoscopy was performed again at 60+/-7 days, the biopsy sites identified, guided by photographic documentation, inspected, and the sampling regime repeated. Biopsies were evaluated for evidence of healing and healthy mucosal regeneration. The patients were assessed at the 3-month follow-up visit and the primary endpoint data submitted to the data safety monitoring board (DSMB). Subjects received a monthly telephone call to ascertain their wellbeing and health status until review and approval of Phase A data by the DSMB.

#### *Phase B*

Following receipt of a satisfactory report on the findings in Phase A by the DSMB on the 29<sup>th</sup> September 2016, the participants' schedules were completed with two further sessions, treatments to the left lower lobe and main stem bronchus, followed by treatments to both the upper lobes, any residual main stem bronchus and the distal end of the trachea. (The right middle lobe was not treated). Airways have been inspected at each procedure and video recordings made. Intervals of 30 to 45 days were imposed between sessions and progression to the next treatment was contingent on the subject remaining stable without evidence of a recent acute exacerbation. An additional twenty-four subjects were enrolled and have undergone their three scheduled treatments: the last subject entered on the 6<sup>th</sup> November 2017. 12-month follow-up was completed on the 14<sup>th</sup> February 2019.

### 2.2. Methodology - Patient-Reported Outcome (PRO) Assessment Tools

The St George's Respiratory Questionnaire (SGRQ) is a 50-item multidimensional instrument to measure quality of life in patients with airways obstruction and to quantify changes after therapy(1, 2). Scores are calculated for three domains: Symptoms (frequency and severity), Activities (that cause or are limited by breathlessness), and Impacts (psycho-social disturbance resulting from airways disease), that are combined to generate a total score. Scores range from 0 to 100, with higher scores indicating more severe limitation. An MCID of  $\geq 4$  is considered meaningful(3).

The COPD Assessment Test (CAT) is an 8-item multidimensional tool that evaluates the impact of the disease (cough, sputum, dyspnoea, chest tightness) on quality of life(4). CAT scores range from 0 to 40, with higher scores denoting more severe impact on an individual's life. An MCID of  $\geq 2$ (5) and a triangulated MCID of  $\geq 2.54$ (6) have been suggested.

The LCQ is a 19-item multidimensional instrument using a 7-point Likert response scale designed to assess the impact of cough on three domains: physical, psychological and social(7). Patients are asked to complete the questionnaire daily for two weeks prior to each follow-up visit. An MCID of  $\geq 1.3$  is considered meaningful(8).

The visual analogue scale (VAS) is a unidimensional psychometric measure for subjective characteristics or attitudes that cannot be objectively quantified. The patient's assessment of his or her current state for a given parameter is indicated with a mark on a linear scale representing the worst to the best outcomes. An MCID is not yet established.

The modified Medical Research Council (mMRC) dyspnoea scale(9) provides a simple means of categorising patients in terms of the disability associated with breathlessness due to COPD(10). A minimum clinically important difference (MCID) of  $\geq 1$  is considered meaningful(11).

### 2.3. Methodology - Device

The RejuvenAir® System is a cryosurgical device that delivers metered doses of medical grade liquid nitrogen from a dewar in a console to a catheter emitting a radial spray at its tip(12). A thermocouple at the distal end of the catheter tailors the dosage of spray to the diameter of the targeted airway. The single-use 5.3-French cryo-catheter, with an introducer, is inserted through the 2mm working channel of a standard therapeutic flexible video-bronchoscope with 4.4mm outer diameter (OD) to reach the targeted site and deliver the vaporised LN<sub>2</sub> at about -195°C(13) with a cooling energy of 25W(14). The spray location guide sheath fits over the shaft of the bronchoscope. 0.5cm graduations facilitate accurate deliveries of MCS incrementally throughout the airway tree.

### 2.4. Methodology – Procedure

The RejuvenAir® procedure is carried out in an operating room or bronchoscopy suite. Enrolled subjects received standard anaesthetic, sedative and associated medications per institutional guidelines and routine clinical practice for their bronchoscopy procedure.

As part of the pre-anaesthetic, glycopyrrolate could be administered to reduce airway secretions. The patient under general anaesthesia is intubated and ventilated with 100% oxygen. The airways are first suctioned clear of mucus using a separate large diameter flexible bronchoscope and the target lobe sampled for routine microbiology using a bronchial wash pre-treatment.

The 4.4mm OD bronchoscope with inserted cryo-catheter is introduced into the endotracheal tube and navigated to the target site as instructed on the console display touchscreen, the catheter extruded several centimetres and the MCS delivered. The catheter is then retracted incrementally by 1cm and at each station a further MCS released.

Treatment 1 delivered MCS to the right lower lobe and main stem bronchus, treatment 2 to the left lower lobe and main stem bronchus, and treatment 3 to both upper lobes, any residual main stem bronchus, and the distal end of the trachea. (The right middle lobe was not treated). Precautionary measures are employed to avoid barotrauma and asphyxia: The spray is emitted at a pressure of less than 1 psi but the expansion of vaporising LN<sub>2</sub> is 696-fold(13, 15). Before each spray the cuff of the endotracheal tube is deflated, and the ventilator disconnected briefly. One-hour post-procedure a chest x-ray is obtained to exclude barotrauma.

Intervals of 30 to 45 days were imposed between sessions and progression to the next treatment was contingent on the subject remaining stable without evidence of a recent acute exacerbation.

### 2.5. Methodology – Assessment of severity of adverse events (AEs):

- a) Mild: Observations and symptoms requiring no intervention.
- b) Moderate: Events leading to minimal non-invasive measures.
- c) Severe:
  - i. Not immediately life-threatening but necessitating hospitalisation
  - ii. Life-threatening indicating urgent intervention
  - iii. Fatal

## **ABBREVIATIONS**

AE – Adverse Event

°C – Celsius

CAT – COPD Assessment Test

COPD – Chronic Obstructive Pulmonary Disease

DSMB – Data Safety Monitoring Board

LCQ – Leicester Cough Questionnaire

LN<sub>2</sub> – Liquid Nitrogen

MCS = Metered CryoSpray

MCID – Minimal clinically important difference

OD – Outer Diameter

SGRQ – St George’s Respiratory Questionnaire

VAS – Visual Analogue Score

W – Watt

## REFERENCES

1. Jones PW, Quirk FH, Baveystock CM. The St George's Respiratory Questionnaire. *Respiratory medicine*. 1991;85 Suppl B:25-31; discussion 3-7.
2. Jones PW, Quirk FH, Baveystock CM, Littlejohns P. A self-complete measure of health status for chronic airflow limitation. The St. George's Respiratory Questionnaire. *The American review of respiratory disease*. 1992;145(6):1321-7.
3. Jones PW. St. George's Respiratory Questionnaire: MCID. *Copd*. 2005;2(1):75-9.
4. Jones PW, Harding G, Berry P, Wiklund I, Chen WH, Kline Leidy N. Development and first validation of the COPD Assessment Test. *The European respiratory journal*. 2009;34(3):648-54.
5. Kon SS, Canavan JL, Jones SE, Nolan CM, Clark AL, Dickson MJ, et al. Minimum clinically important difference for the COPD Assessment Test: a prospective analysis. *The Lancet Respiratory medicine*. 2014;2(3):195-203.
6. Alma H, de Jong C, Tsiligianni I, Sanderman R, Kocks J, van der Molen T. Clinically relevant differences in COPD health status: systematic review and triangulation. *European Respiratory Journal*. 2018;52(3):1800412.
7. Birring SS, Prudon B, Carr AJ, Singh SJ, Morgan MDL, Pavord ID. Development of a symptom specific health status measure for patients with chronic cough: Leicester Cough Questionnaire (LCQ). *Thorax*. 2003;58(4):339-43.
8. Raj AA, Pavord DI, Birring SS. Clinical cough IV: what is the minimal important difference for the Leicester Cough Questionnaire? *Handb Exp Pharmacol*. 2009(187):311-20.
9. Mahler DA, Wells CK. Evaluation of clinical methods for rating dyspnea. *Chest*. 1988;93(3):580-6.
10. Bestall JC, Paul EA, Garrod R, Garnham R, Jones PW, Wedzicha JA. Usefulness of the Medical Research Council (MRC) dyspnoea scale as a measure of disability in patients with chronic obstructive pulmonary disease. *Thorax*. 1999;54(7):581-6.
11. Araújo Oliveira AL, Andrade L, Marques A. Minimal clinically important difference and predictive validity of the mMRC and mBorg in acute exacerbations of COPD. *European Respiratory Journal*. 2017;50(suppl 61):PA4705.
12. Mulcahey TI, Coad JE, Fan WL, Grasso DJ, Hanley BM, Hawkes HV, et al. Metered Cryospray: a novel uniform, controlled, and consistent in vivo application of liquid nitrogen cryogenic spray. *Medical devices (Auckland, NZ)*. 2017;10:29-41.
13. Lemmon EW, McLinden, M. O., Friend, D. G., & National Institute of Standards and Technology (U.S.). *Thermophysical properties of fluid systems. (NIST chemistry webbook.)*. 1998.
14. Au JT, Carson J, Monette S, Finley DJ. Spray cryotherapy is effective for bronchoscopic, endoscopic and open ablation of thoracic tissues. *Interactive cardiovascular and thoracic surgery*. 2012;15(4):580-4.
15. Unit Conversion Data for Nitrogen Universal Industrial Gases, Inc. 2019.
